# Supplementary material for: Constructing novel Ag nanoparticles anchored on MnO2 nanowires as an efficient visible light driven photocatalyst
Source: Royal Society of Chemistry journal article supplement (doi:10.1039/c6ra10444d), 2016-01-01

**Constructing novel Ag nanoparticles anchored on MnO<sub>2</sub> nanowires as an  
efficient visible light driven photocatalyst**

K. Saravanakumar<sup>1</sup>, V. Muthuraj<sup>1\*</sup>, S. Vadivel<sup>2</sup>

<sup>1</sup>Department of Chemistry, VHNSN College, Virudhunagar-626 001, Tamil Nadu, India

<sup>2</sup>Department of Chemistry, NGM College, Pollachi -Tamilnadu, India

\*Corresponding author: Dr. V. Muthuraj

E-Mail: muthuraj75@gmail.com; Tel: +91 9940965228

## Supporting Figures

Figure S1. FT-IR spectra of the as-prepared (a) pure  $\text{MnO}_2$  and  $\text{Ag@MnO}_2$  nanocomposites with different Ag content: (b) 1%, (c) 5%, (d) 10% and (e) 15%

Figure S2. EDX elemental mapping analysis of  $\text{Ag@MnO}_2$  (5%) nanocomposite, red (Ag), green (Mn) and blue (O).

Figure S3. Absorption spectra of VB dye solution under visible light in the presence of different catalyst, (a) blank test, (b)  $\text{MnO}_2$ , (c)  $\text{Ag@MnO}_2$  (1%), (d)  $\text{Ag@MnO}_2$  (15%), (e)  $\text{Ag@MnO}_2$  (10%).

Figure S4. Photodegradation of dye solutions under different doses of  $\text{Ag@MnO}_2$  (5%) (a) VB and (b) Amaranth.

Figure S5. Photodegradation by  $\text{Ag@MnO}_2$  (5%) at different pH of (a) VB and (b) Amaranth dye solutions.

Figure S6. Effects of initial dye concentration on photocatalytic degradation of (a) VB and (b) Amaranth.

Figure S7. (a) Recycling experiments for photodegradation of VB by  $\text{Ag@MnO}_2$  (5%) nanocomposite and (b) XRD pattern of  $\text{Ag@MnO}_2$  (5%) nanocomposite before and after photocatalytic process.

Figure S1.

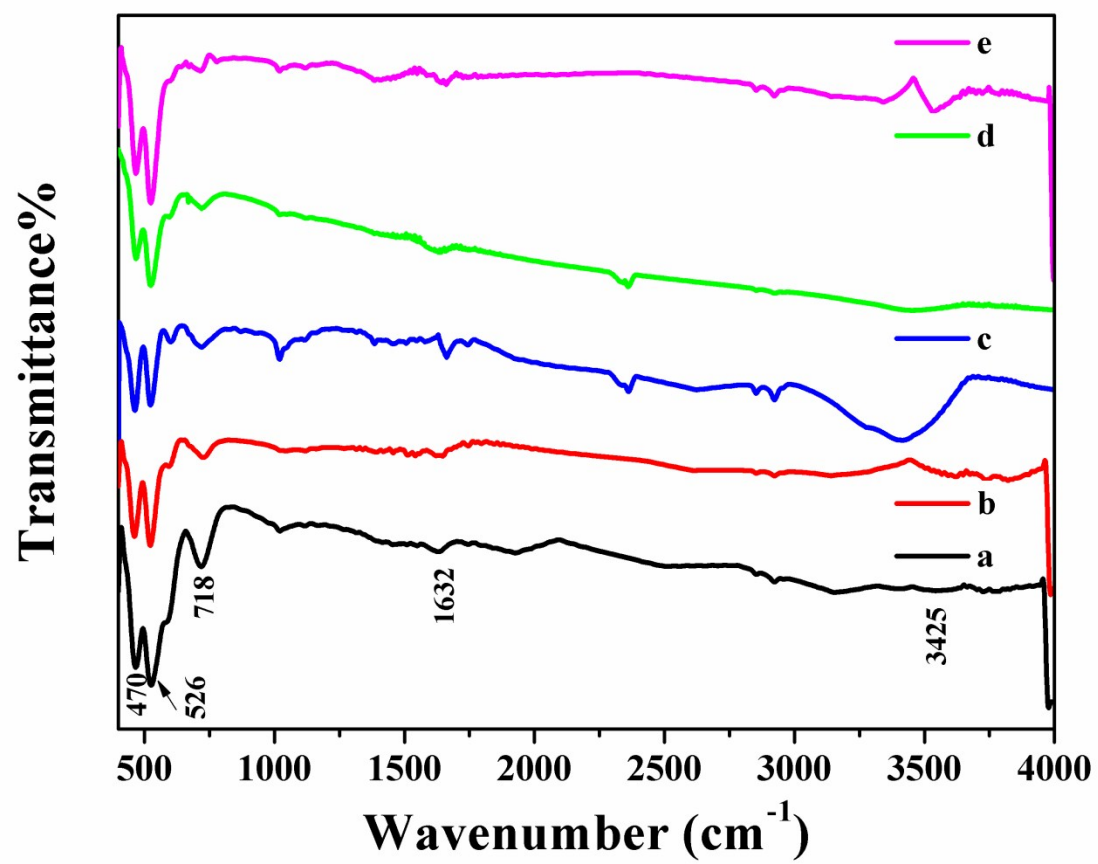

Figure S2.

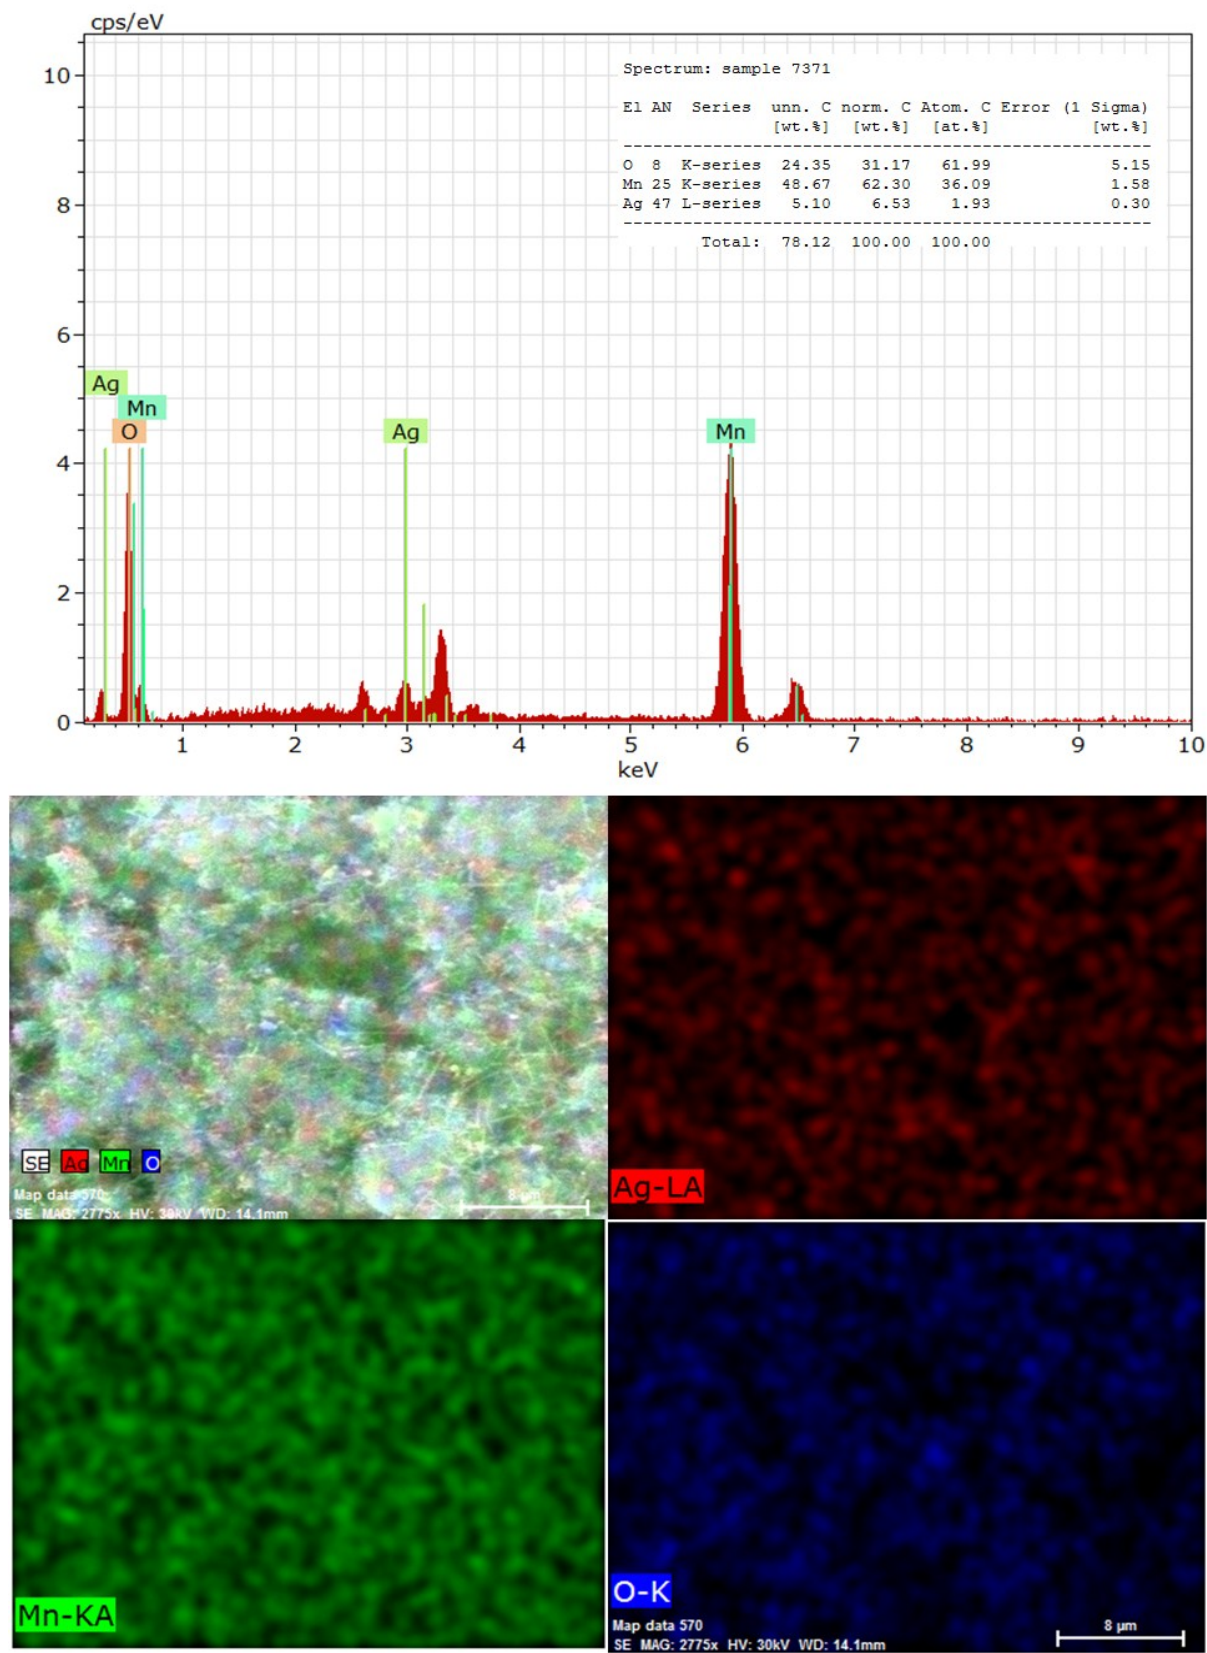

Figure S3.

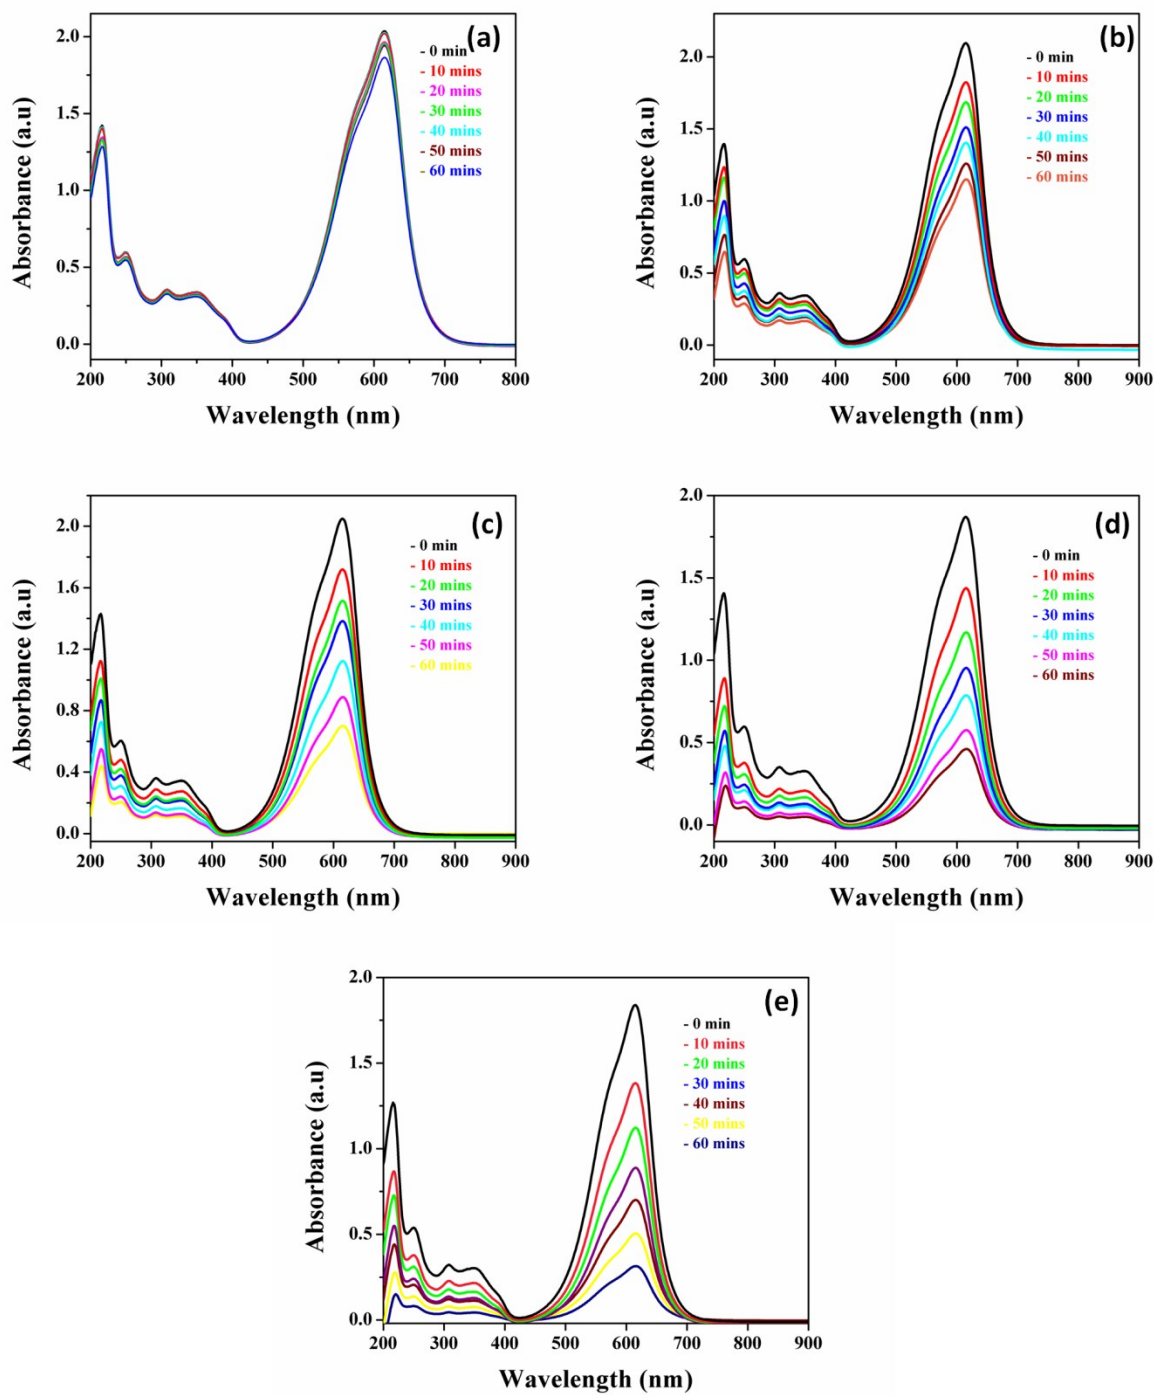

Figure S4.

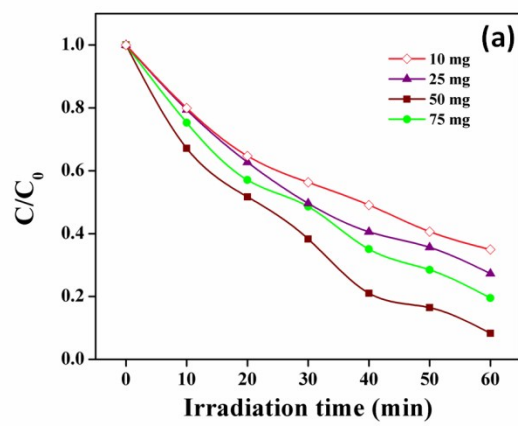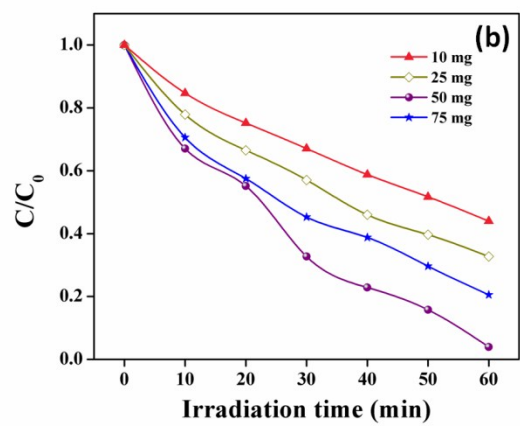

Figure S5.

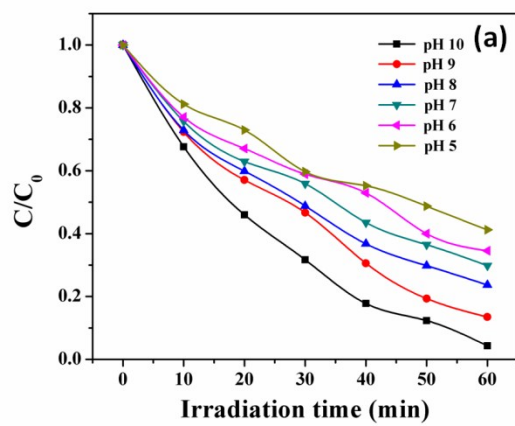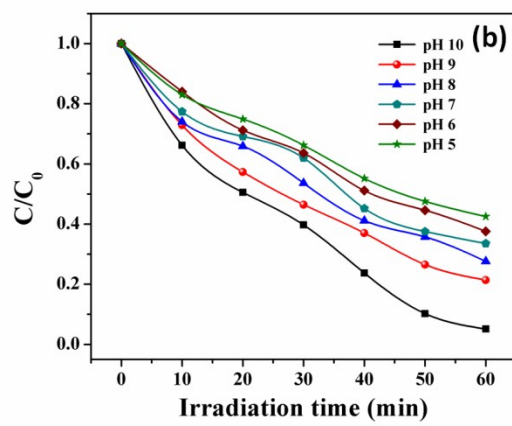

Figure S6.

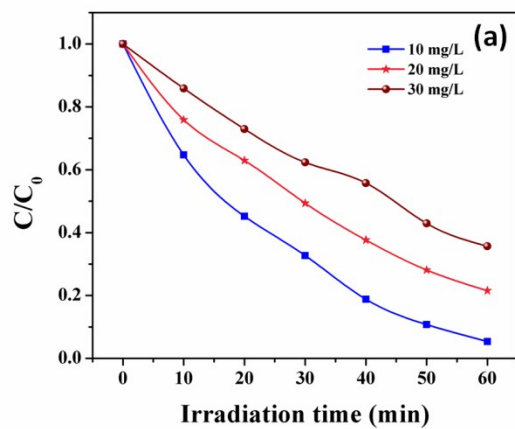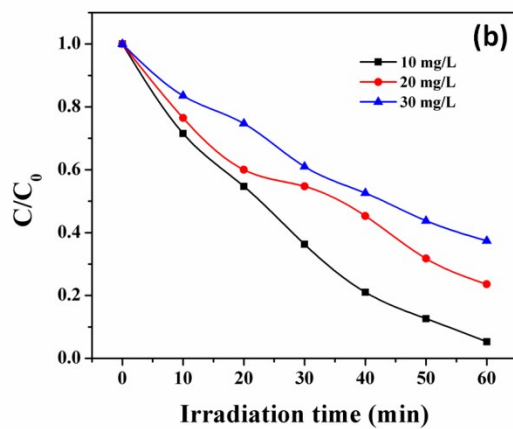



Figure S7.

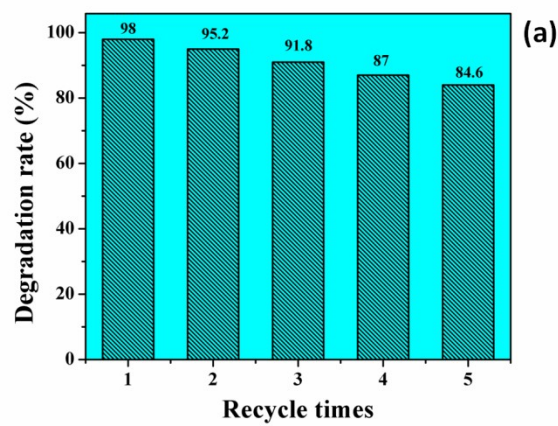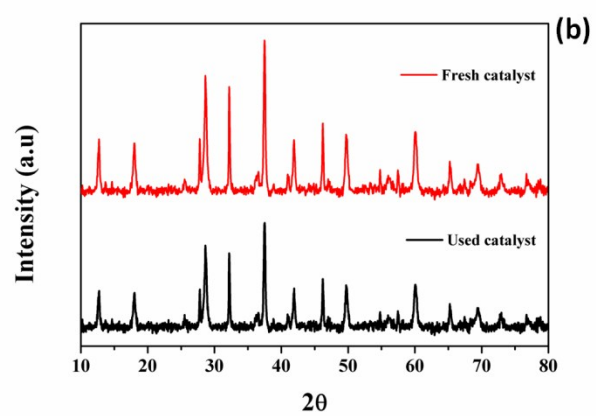

Supplement: c6ra10444d1.pdf [file c6ra10444d1.pdf]
